# Supplementary material for: Antagonizing MDM2 Overexpression Induced by MDM4 Inhibitor CEP-1347 Effectively Reactivates Wild-Type p53 in Malignant Brain Tumor Cells
Source: MDPI journal article supplement (doi:10.3390/cancers15174326), 2023-08-30
Supplement: s1 [file s1]

# Supplementary Materials: Antagonizing MDM2 Overexpression Induced by MDM4 Inhibitor CEP-1347 Effectively Reactivates Wild-Type p53 in Malignant Brain Tumor Cells

Yuta Mitobe, Shuhei Suzuki, Yurika Nakagawa-Saito, Keita Togashi, Asuka Sugai, Yukihiro Sonoda, Chifumi Kitanaka and Masashi Okada

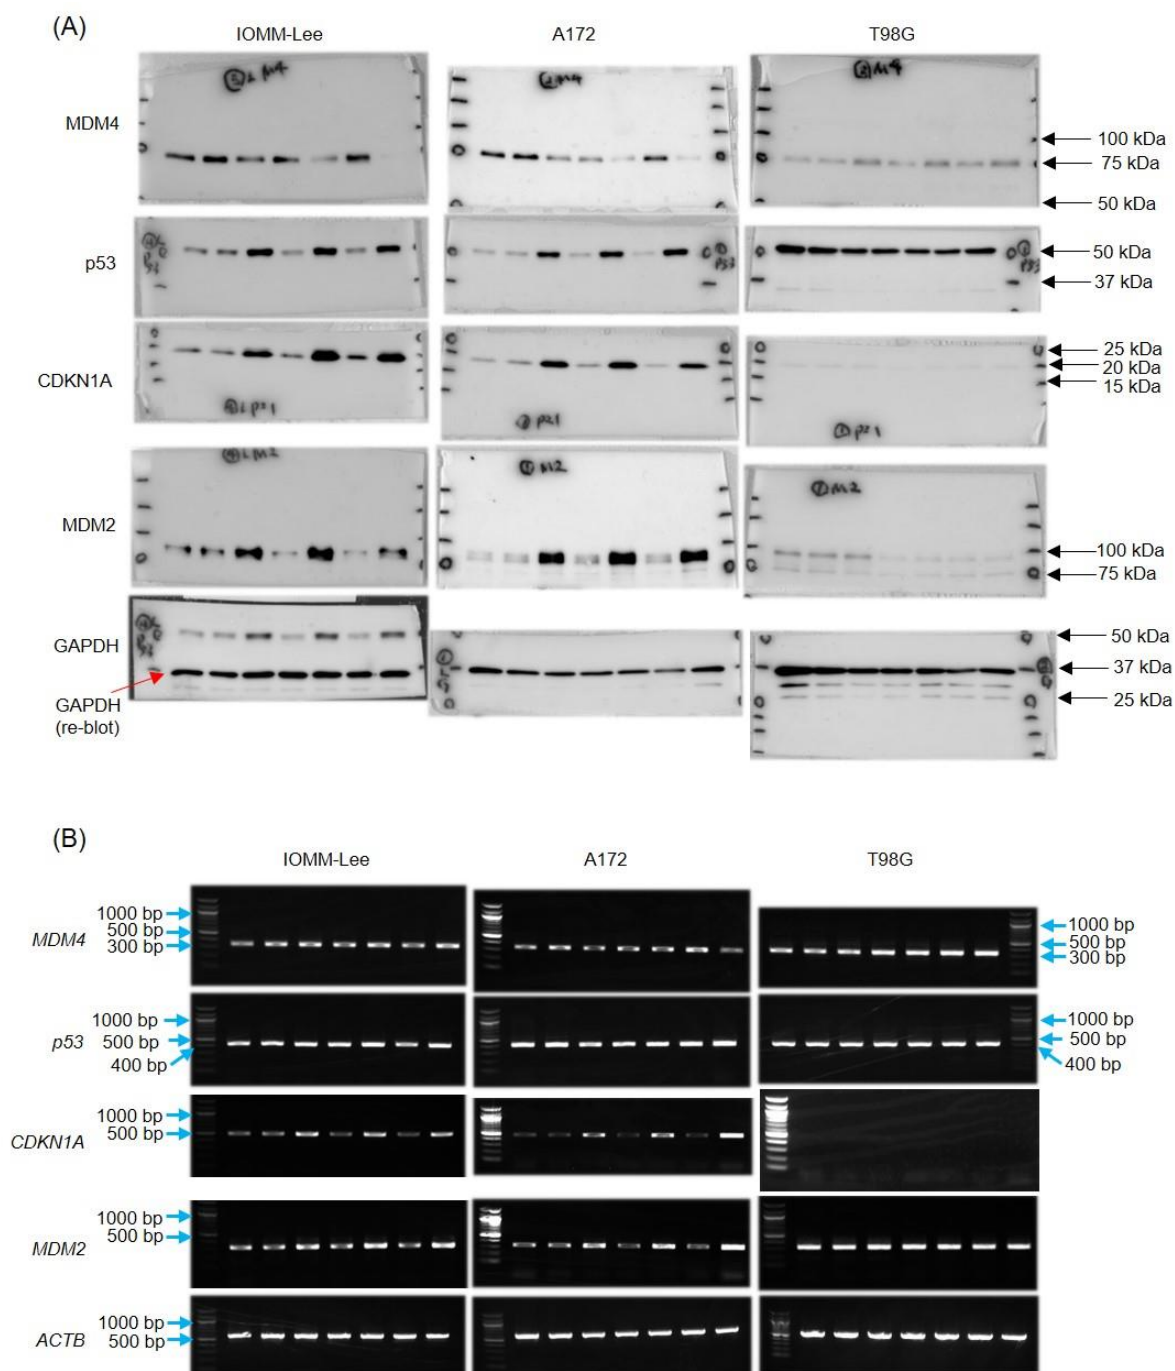

**Figure S1.** Uncropped Western Blot and RT-PCR images for Figure 1.

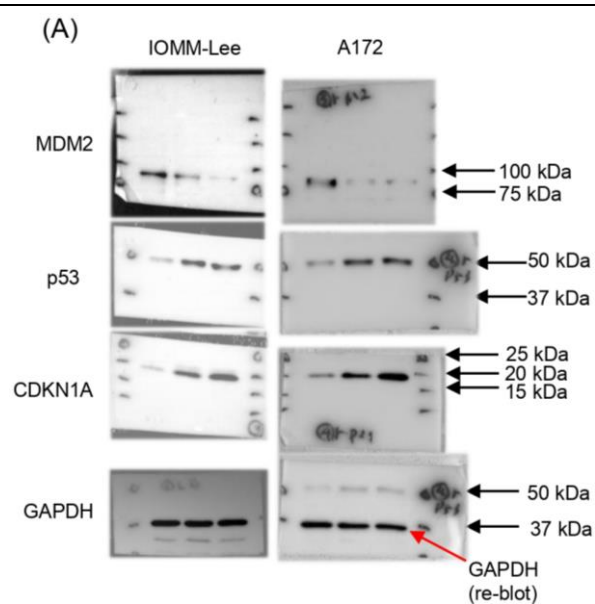

**Figure S2.** Uncropped Western Blot images for Figure 2.

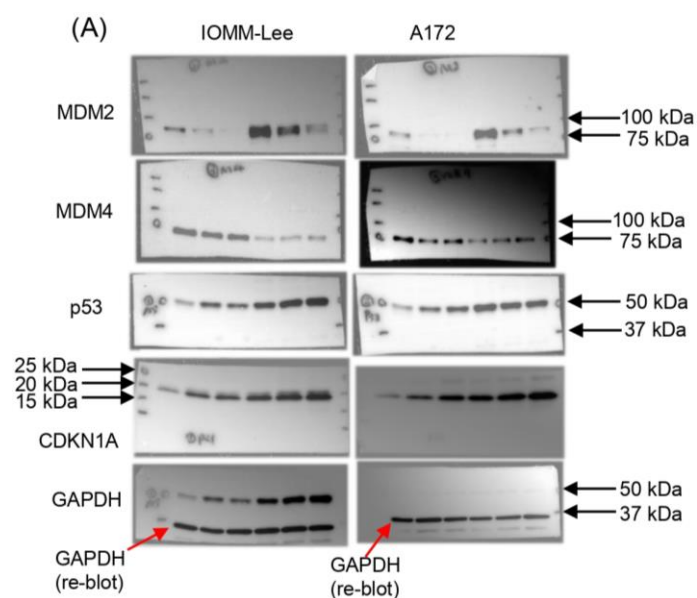

**Figure S3.** Uncropped Western Blot images for Figure 3.

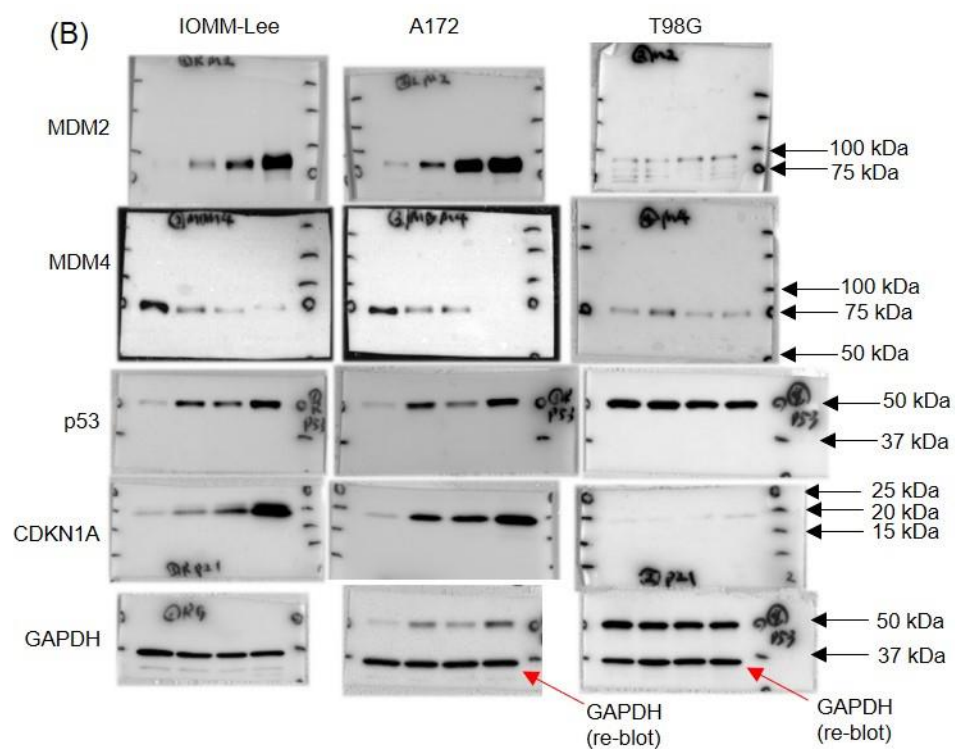

**Figure S4.** Uncropped Western Blot images for Figure 4.
